# Supplementary material
Source: publisher figshare collection journal article supplement (https://acs.figshare.com/ndownloader/files/18608150)
Supplement: Supplementary file 1 [file 18608150]

## Supporting Information

### Ellagitannins with Glucopyranose Cores Have Higher Affinities to Proteins than Acyclic Ellagitannins by Isothermal Titration Calorimetry

Maarit Karonen<sup>\*,†</sup>, Marianne Oraviita<sup>†</sup>, Irene Mueller-Harvey<sup>‡</sup>, Juha-Pekka Salminen<sup>†</sup>, and Rebecca J. Green<sup>\*,§</sup>

<sup>†</sup>Natural Chemistry Research Group, Department of Chemistry, University of Turku, Vatselankatu 2, FI-20014 Turku, Finland

<sup>‡</sup>School of Agriculture, Policy and Development, University of Reading, Earley Gate, P.O. Box 236, Reading RG6 6AT, United Kingdom

<sup>§</sup>School of Chemistry, Food and Pharmacy, University of Reading, Whiteknights, P.O. Box 224, Reading RG6 6AP, United Kingdom

\* (M.K.) Tel: + 358 29 450 3179. E-mail: maarit.karonen@utu.fi.; (R.J.G) Phone: +44 118 378 8446. E-mail: rebecca.green@reading.ac.uk.

## List of Supporting Information

Figure S1. Examples of thermograms for the interactions of cyclic monomeric ellagitannins with BSA (raw heat data, no control experiments subtracted): A) tellimagrandin I into 30  $\mu$ M BSA, B) tellimagrandin II into 30  $\mu$ M BSA and C) geraniin into 40  $\mu$ M BSA.

Figure S2. Examples of thermograms for the interactions of cyclic dimeric and trimeric ellagitannins with BSA (raw heat data, no control experiments subtracted): A) agrimoniin into 30  $\mu$ M BSA, B) gemin A into 30  $\mu$ M BSA, C) sanguin H-6 into 30  $\mu$ M BSA and D) lambertianin C into 30  $\mu$ M BSA.

Figure S3. Examples of thermograms for the interactions of acyclic monomeric ellagitannins with BSA (raw heat data, no control experiments subtracted): A) castalagin into 30  $\mu$ M BSA, B) vescalagin into 30  $\mu$ M BSA, C) castavalonic acid into 30  $\mu$ M BSA and D) vescavalonic acid into 30  $\mu$ M BSA.

Figure S4. Examples of thermograms for the interactions of cyclic monomeric ellagitannins with gelatin (raw heat data, no control experiments subtracted): A) tellimagrandin I into 15  $\mu$ M gelatin, B) tellimagrandin II into 20  $\mu$ M gelatin and C) geraniin into 20  $\mu$ M gelatin.

Figure S5. Examples of thermograms for the interactions of cyclic dimeric and trimeric ellagitannins with gelatin (raw heat data, no control experiments subtracted): A) agrimoniin into 30  $\mu$ M gelatin, B) gemin A into 30  $\mu$ M gelatin, C) sanguin H-6 into 30  $\mu$ M gelatin and D) lambertianin C into 30  $\mu$ M gelatin.

Figure S6. Examples of thermograms for the interactions of acyclic monomeric ellagitannins with gelatin (raw heat data, no control experiments subtracted): A) castalagin into 20  $\mu$ M gelatin, B) vescalagin into 20  $\mu$ M gelatin, C) castavalonic acid into 20  $\mu$ M gelatin and D) vescavalonic acid into 20  $\mu$ M gelatin.

Table S1. Estimated Entropies for the Interactions of Ellagitannins with BSA and Gelatin Fitted by Two-Site and One-Site Binding Models

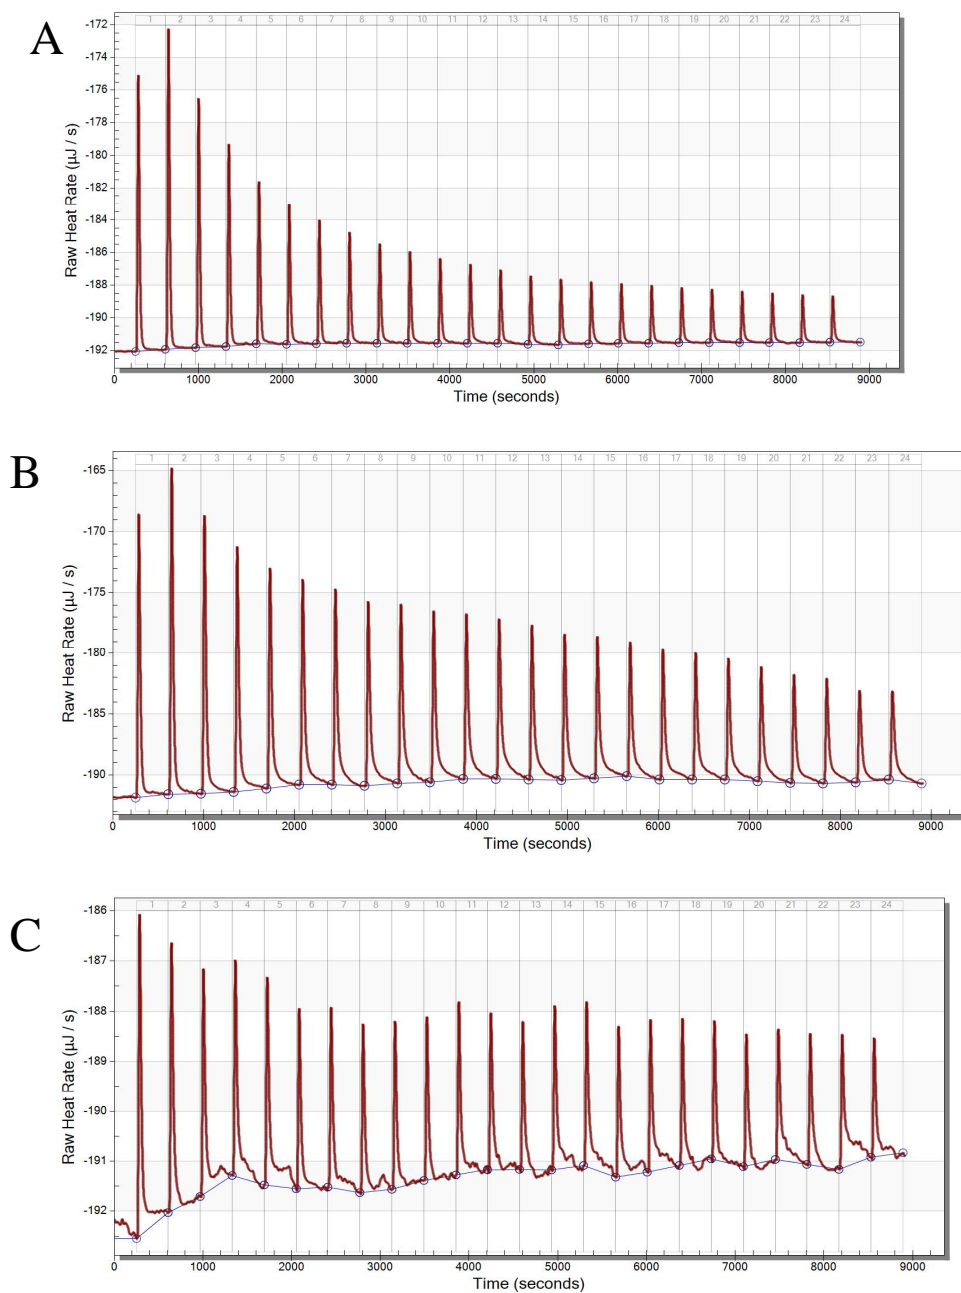

Figure S1. Examples of thermograms for the interactions of cyclic monomeric ellagitannins with BSA (raw heat data, no control experiments subtracted): A) tellimagrandin I into 30  $\mu\text{M}$  BSA, B) tellimagrandin II into 30  $\mu\text{M}$  BSA and C) geraniin into 40  $\mu\text{M}$  BSA.

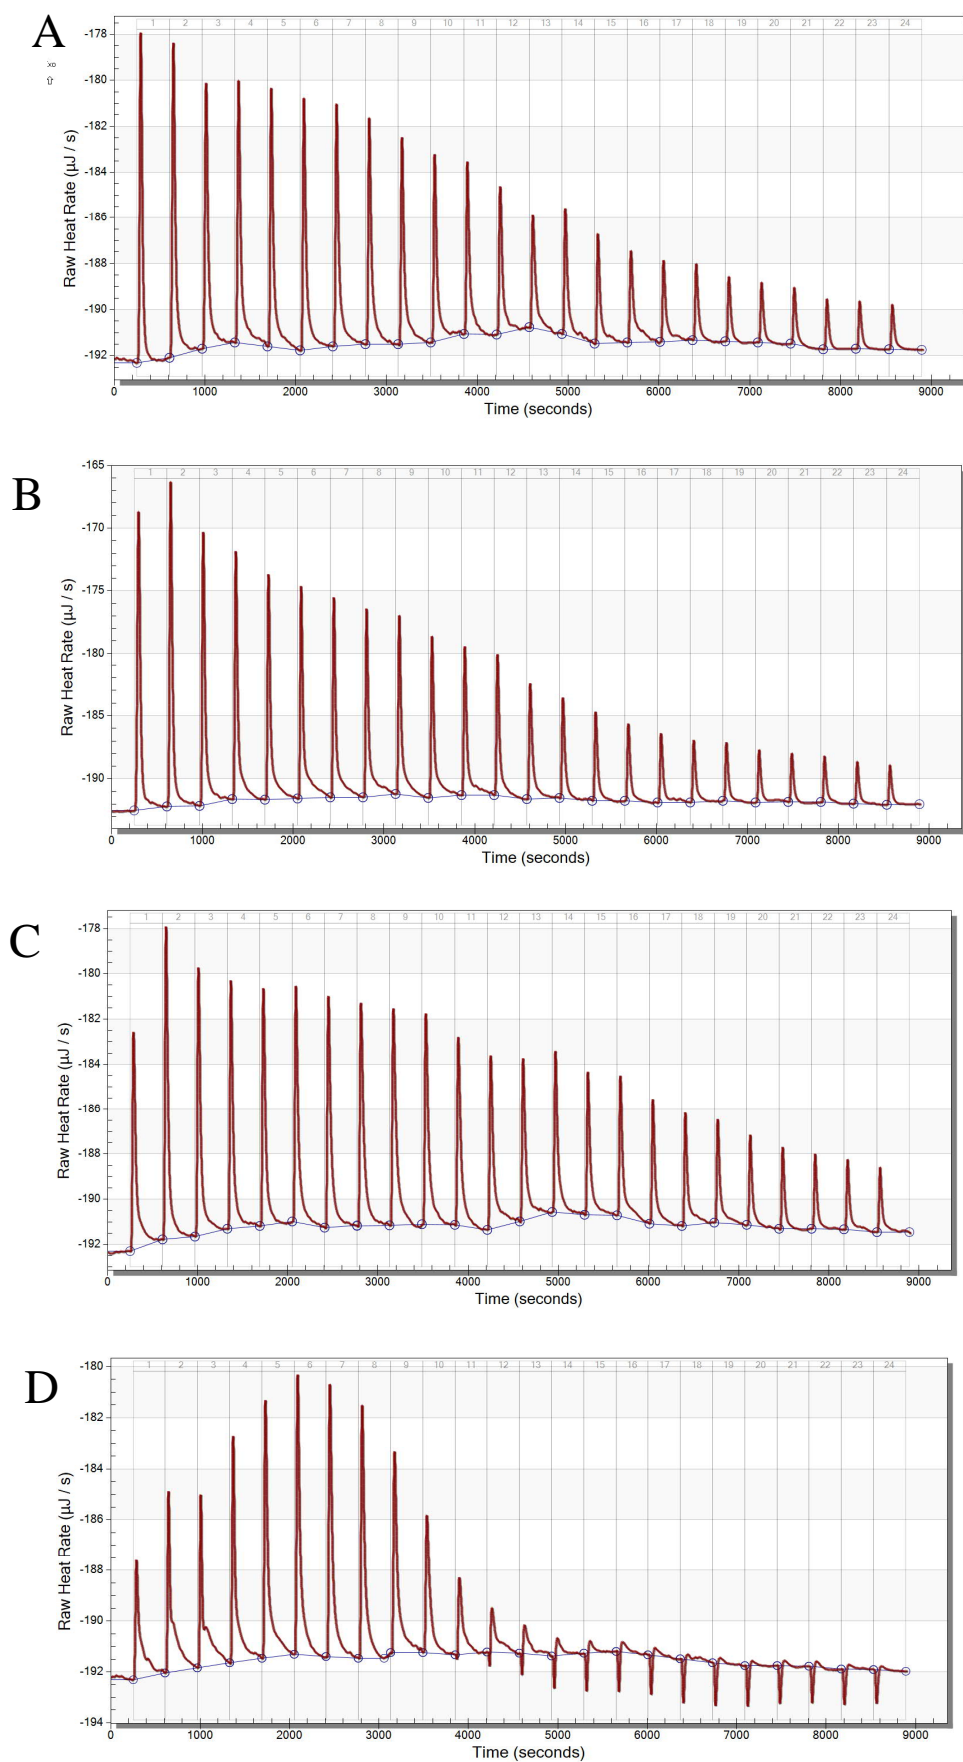

Figure S2. Examples of thermograms for the interactions of cyclic dimeric and trimeric ellagitannins with BSA (raw heat data, no control experiments subtracted): A) agrimoniin into 30  $\mu\text{M}$  BSA, B) gemin A into 30  $\mu\text{M}$  BSA, C) sanguiin H-6 into 30  $\mu\text{M}$  BSA and D) lambertianin C into 30  $\mu\text{M}$  BSA.

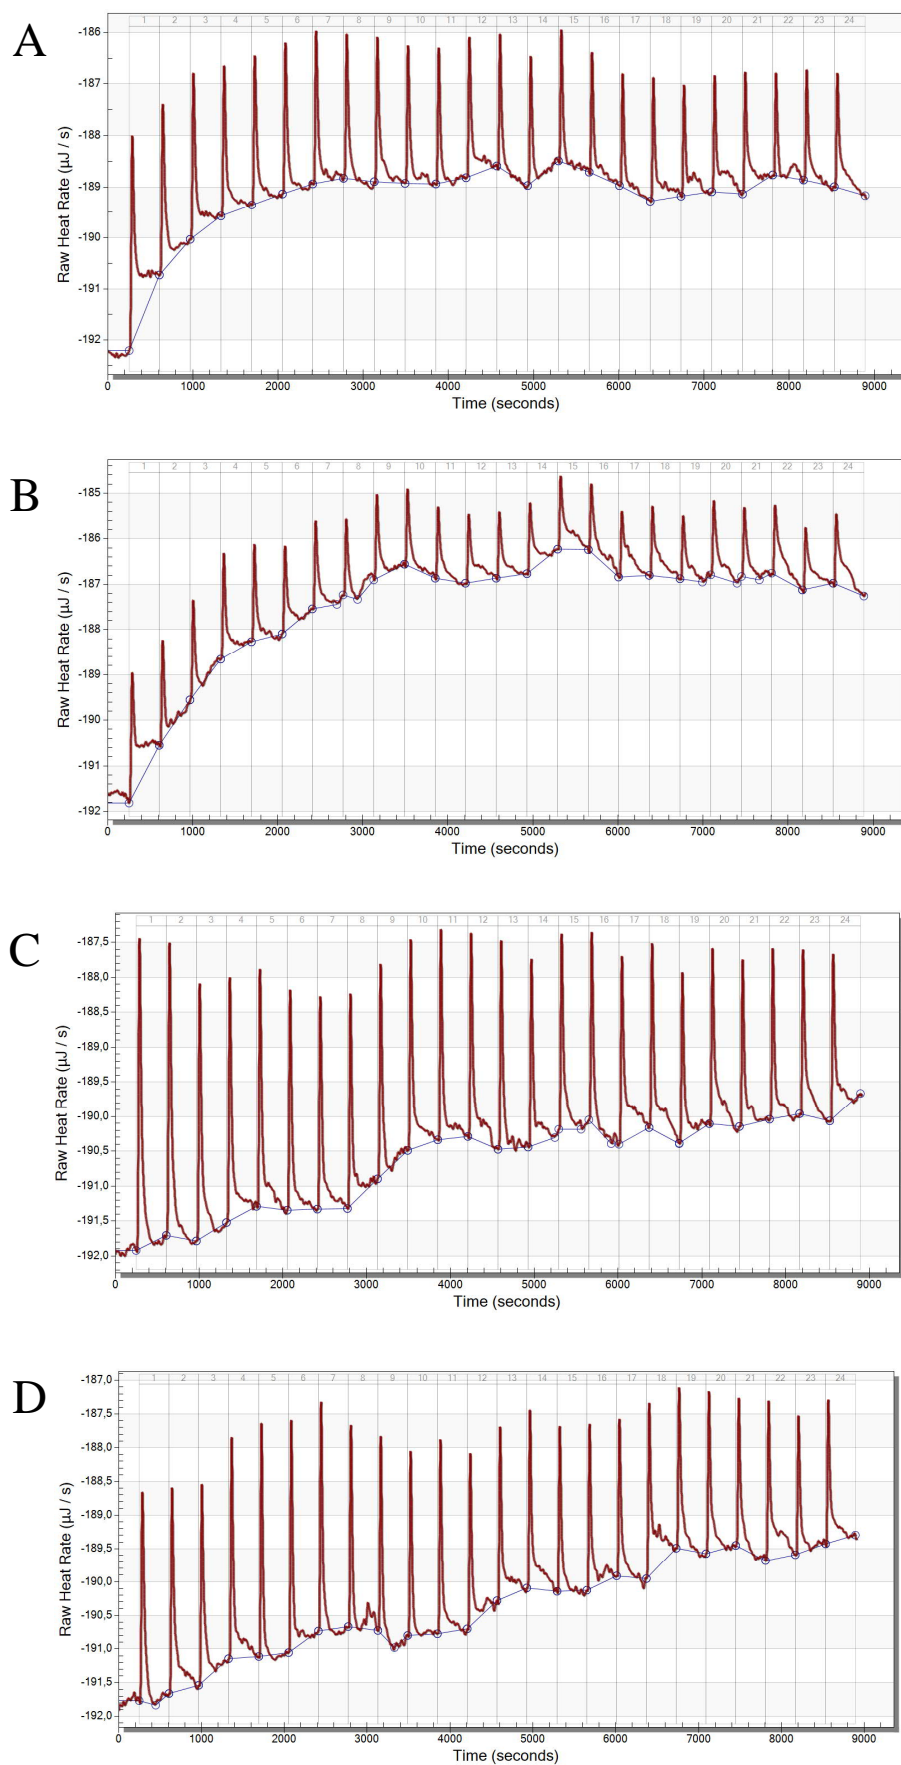

Figure S3. Examples of thermograms for the interactions of acyclic monomeric ellagitannins with BSA (raw heat data, no control experiments subtracted): A) castalagin into 30  $\mu\text{M}$  BSA, B) vescalagin into 30  $\mu\text{M}$  BSA, C) castavalonic acid into 30  $\mu\text{M}$  BSA and D) vescavalonic acid into 30  $\mu\text{M}$  BSA.

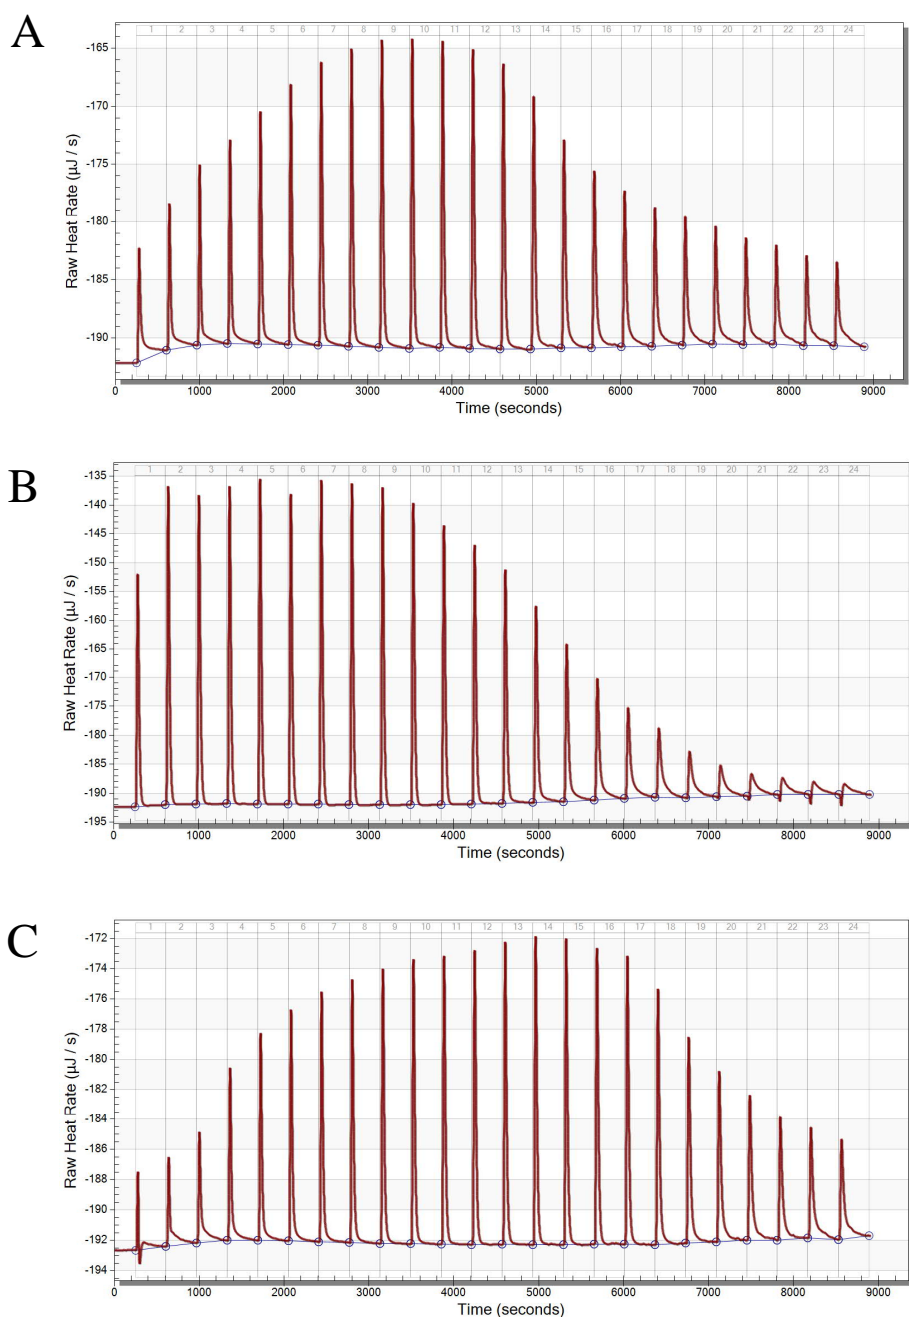

Figure S4. Examples of thermograms for the interactions of cyclic monomeric ellagitannins with gelatin (raw heat data, no control experiments subtracted): A) tellimagrandin I into 15  $\mu\text{M}$  gelatin, B) tellimagrandin II into 20  $\mu\text{M}$  gelatin and C) geraniin into 20  $\mu\text{M}$  gelatin.

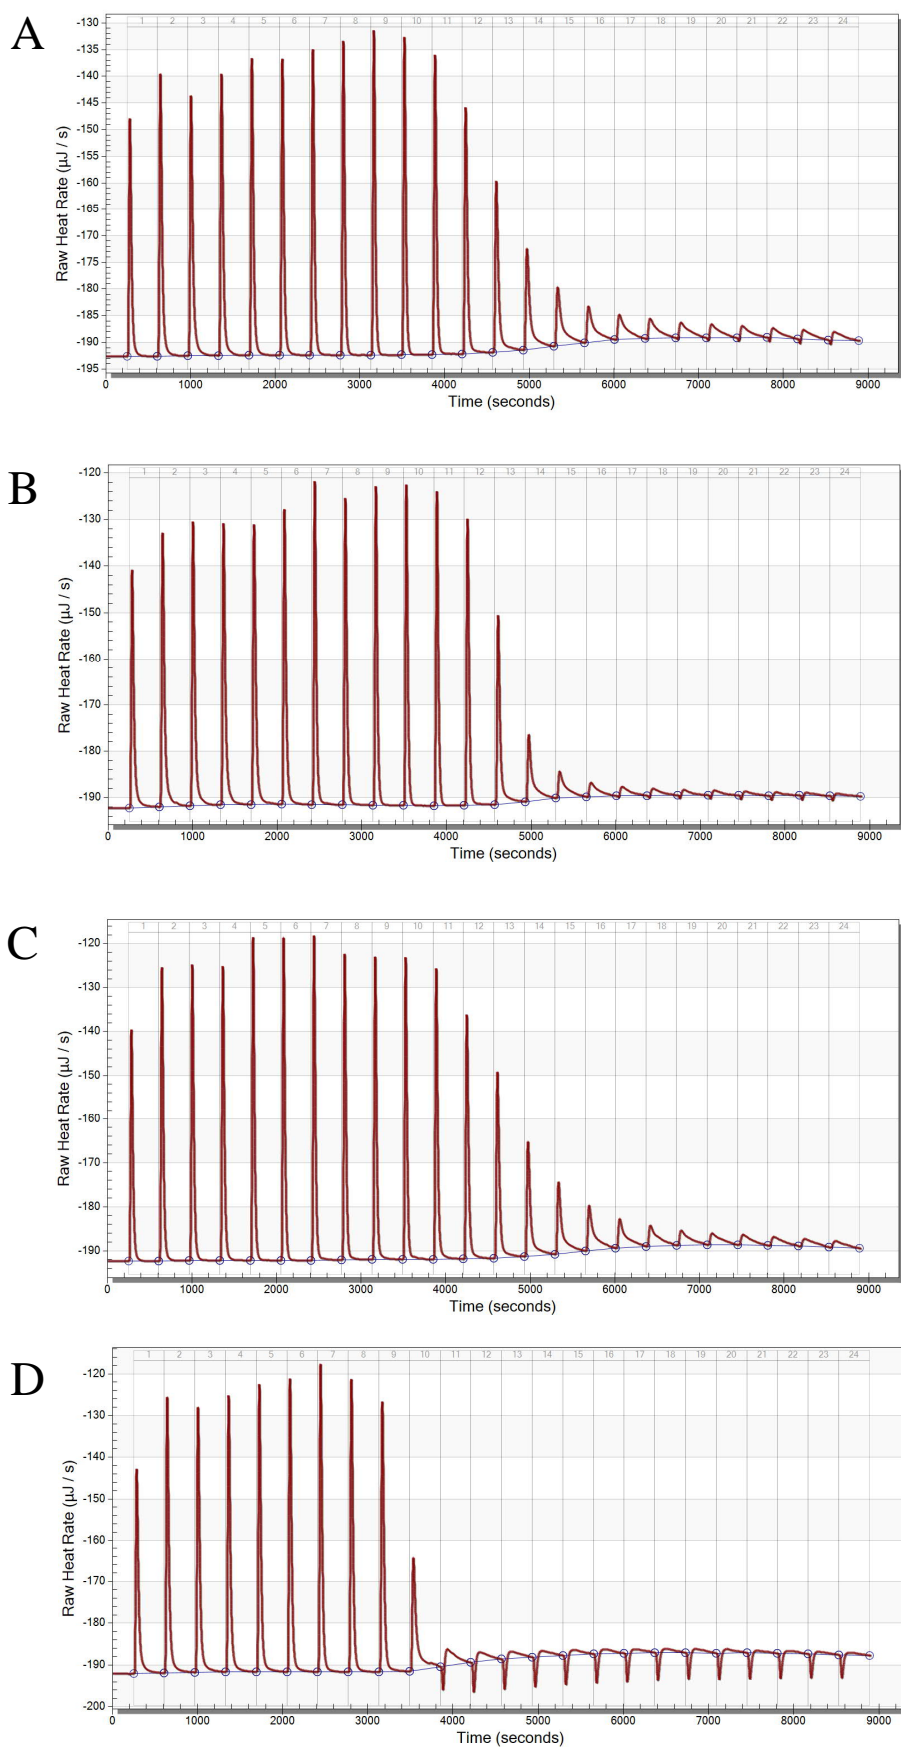

Figure S5. Examples of thermograms for the interactions of cyclic dimeric and trimeric ellagitannins with gelatin (raw heat data, no control experiments subtracted): A) agrimonin into 30  $\mu\text{M}$  gelatin, B) gemin A into 30  $\mu\text{M}$  gelatin, C) sanguin H-6 into 30  $\mu\text{M}$  gelatin and D) lambertianin C into 30  $\mu\text{M}$  gelatin.



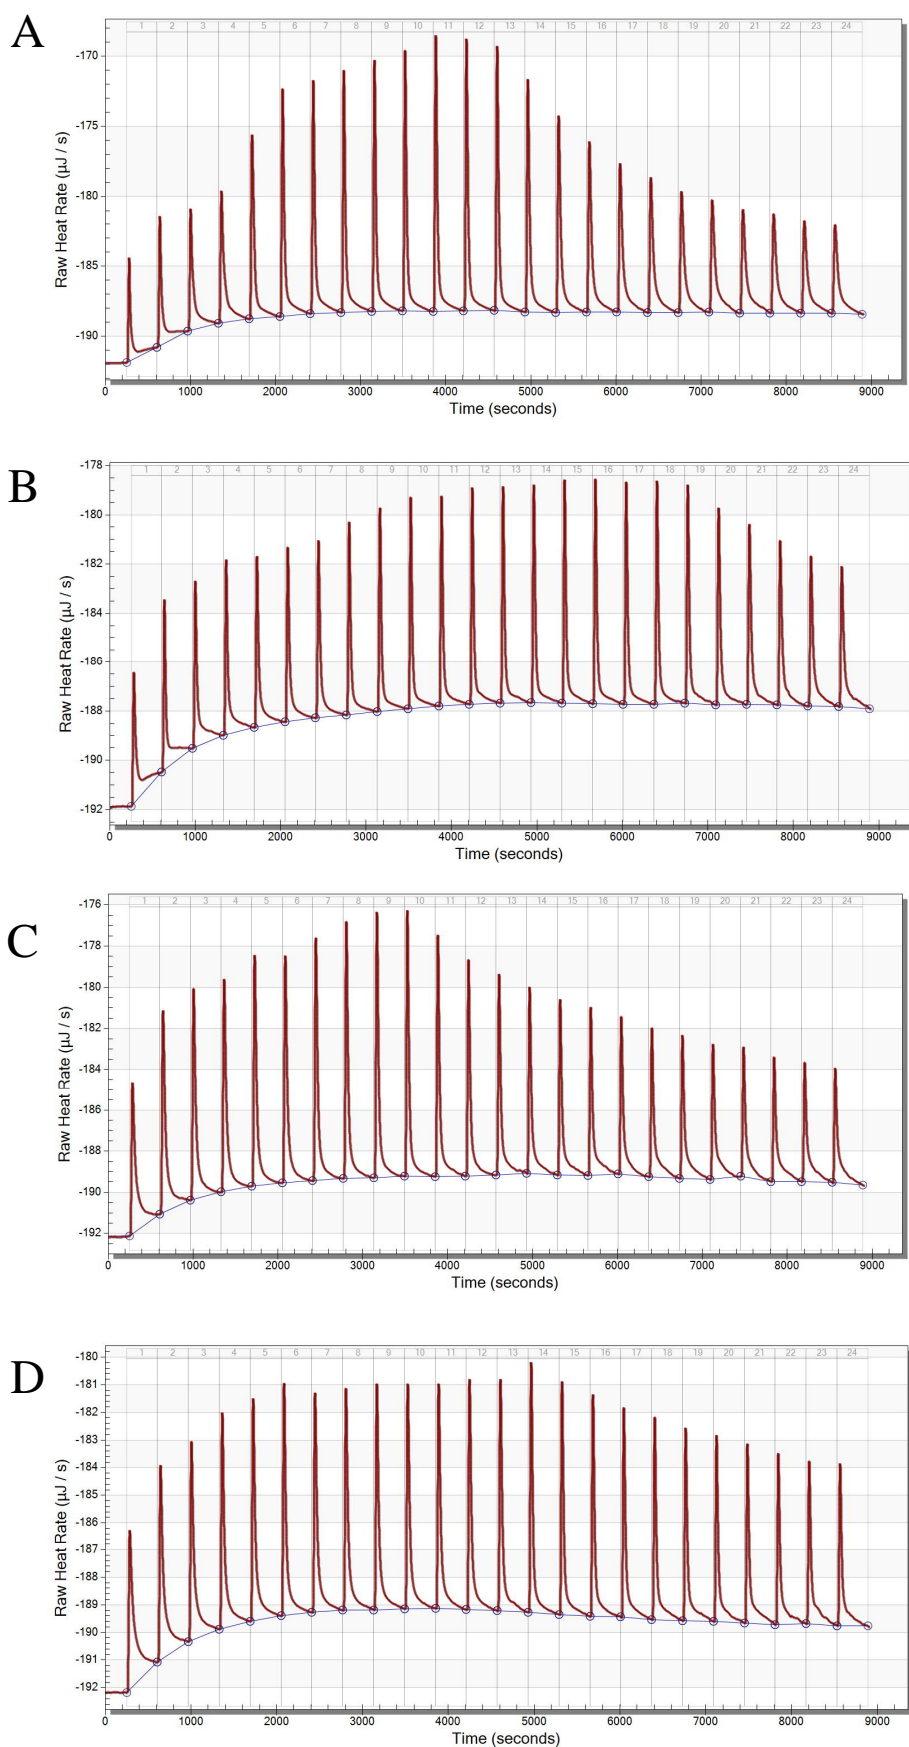

Figure S6. Examples of thermograms for the interactions of acyclic monomeric ellagitannins with gelatin (raw heat data, no control experiments subtracted): A) castalagin into 20  $\mu\text{M}$  gelatin, B) vescalagin into 20  $\mu\text{M}$  gelatin, C) castavalonic acid into 20  $\mu\text{M}$  gelatin and D) vescavalonic acid into 20  $\mu\text{M}$  gelatin.



Table S1. Estimated Entropies for the Interactions of Ellagitannins with BSA and Gelatin Fitted by Two-Site and One-Site Binding Models

|                                                     | Tellimagrandin I | Tellimagrandin II | Agrimoniin | Gemin A  | Sanguiin H-6 | Roshenin C | Lambertianin C |
|-----------------------------------------------------|------------------|-------------------|------------|----------|--------------|------------|----------------|
| <b>BSA</b>                                          |                  |                   |            |          |              |            |                |
| <b>Two-Site</b>                                     |                  |                   |            |          |              |            |                |
| $\Delta S_1$ (J mol <sup>-1</sup> K <sup>-1</sup> ) | 15 ± 14          | -38 ± 22          | 26 ± 17    | -45 ± 2  | 28 ± 4       |            | 16 ± 7         |
| $\Delta S_2$ (J mol <sup>-1</sup> K <sup>-1</sup> ) | 18 ± 22          | -64 ± 23          | 28 ± 4     | 29 ± 7   | 38 ± 7       |            | 46 ± 13        |
| <b>One-Site</b>                                     |                  |                   |            |          |              |            |                |
| $\Delta S_1$ (J mol <sup>-1</sup> K <sup>-1</sup> ) | 2 ± 24           | -52 ± 25          | 1 ± 18     | -73 ± 14 | -8 ± 10      |            | 4 ± 7          |
| <b>Gelatin</b>                                      |                  |                   |            |          |              |            |                |
| <b>Two-Site</b>                                     |                  |                   |            |          |              |            |                |
| $\Delta S_1$ (J mol <sup>-1</sup> K <sup>-1</sup> ) | 53 ± 10          | -93 ± 1           | -117 ± 17  | -99 ± 8  | -108 ± 14    | -2 ± 13    | -185 ± 22      |
| $\Delta S_2$ (J mol <sup>-1</sup> K <sup>-1</sup> ) | 55 ± 8           | 64 ± 2            | 44 ± 7     | 32 ± 4   | 49 ± 2       | 31 ± 4     | -28 ± 34       |
| <b>One-Site</b>                                     |                  |                   |            |          |              |            |                |
| $\Delta S_1$ (J mol <sup>-1</sup> K <sup>-1</sup> ) | -57 ± 30         | -103 ± 7          | -163 ± 17  | -165 ± 5 | -170 ± 9     | -112 ± 27  | -194 ± 18      |
